# Supplementary material
Source: PubMed Central journal article supplement (PMC9416872)

### **Supplemental content for Paramagnetic Rim Lesions in Multiple Sclerosis: Comparison of Visualization at 1.5-T and 3-T MRI**

*Christopher C. Hemond, MD, Daniel S. Reich, MD, PhD, Sathish K. Dundumadappa, MD*

[doi.org/10.2214/AJR.21.26777](https://doi.org/10.2214/AJR.21.26777)

Published online: December 1, 2021

The authors have supplied these materials to give readers additional information about the work.

This content is provided as supplied by the authors during the peer review process. After acceptance, the content is reviewed by the journal office to ensure compliance with specific journal requirements but otherwise does not undergo copyediting, verification, or layout. The authors are solely responsible for the accuracy of the content.

**Figure S1**-Lesion containing heterogeneous paramagnetic content. Axial filtered-phase SWAN (A) and FLAIR (B) images at 3 T in 49-year-old man with relapsing multiple sclerosis show a lesion with discordant classification between readers in terms of being either isointense or diffusely paramagnetic. The heterogeneous paramagnetic signal within this confluent lesion in part relates to paramagnetic signal within the optic radiations. SWAN = susceptibility-weighted angiography

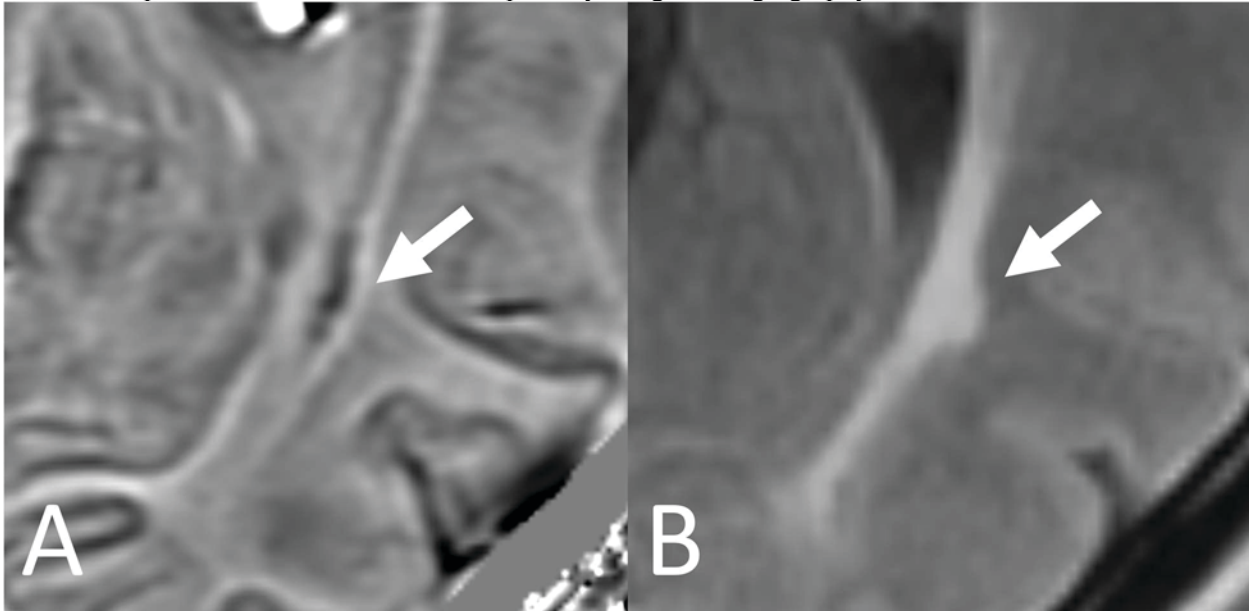

**Figure S2**-Lesions with discordant classification as paramagnetic rim lesion (PRL) between field strengths. Axial filtered-phase SWAN and FLAIR images depict lesions with discordant classification between raters in terms of PRL in two patients with multiple sclerosis. Patient 1 is 37-year-old woman [1.5 T: filtered-phase SWAN (A), FLAIR (B); 3 T: filtered-phase SWAN (C), FLAIR (D)]. Patient 2 is 56-year-old man [1.5 T: filtered-phase SWAN (E), FLAIR (F); 3 T: filtered-phase SWAN (G), FLAIR (H)]. In both patients, the FLAIR lesion was classified as PRL at 1.5 T but not at 3 T, likely representing false positive assessment at 1.5 T, in turn attributable to the relatively more circular configuration of vessels at 1.5 T. SWAN = susceptibility-weighted angiography

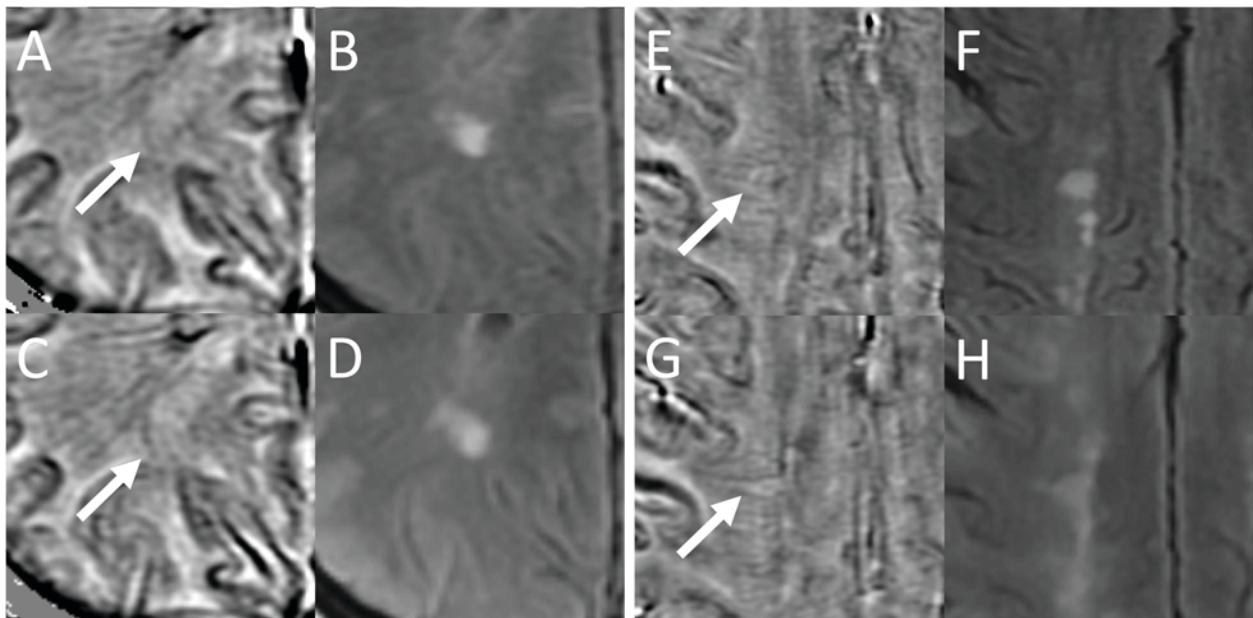

**Figure S3**-Lesions initially classified as not paramagnetic rim lesions (PRLs) at a given field strength by both readers, but classified as PRLs at subsequent 3-rater consensus review. Axial filtered-phase SWAN and FLAIR images depict such lesions in two patients with multiple sclerosis. Patient 1 is 49-year-old man [1.5 T: filtered-phase SWAN (A), FLAIR (B); 3 T: filtered-phase SWAN (C), FLAIR (D)]. Patient 2 is 64-year-old man [1.5 T: filtered-phase SWAN (E), FLAIR (F); 3 T: filtered-phase SWAN (G), FLAIR (H)]. In patient 1, the lesion identified on FLAIR was initially classified as an isointense lesion at 1.5 T but a PRL at 3 T; however, the lesion was classified as a PRL as well at 1.5 T at later consensus review, when a faint paramagnetic rim was identified. In patient 2, the lesion on FLAIR was initially classified as PRL at 1.5 T but as isointense at 3 T; however, the lesion was classified as a PRL as well at 3 T at later consensus review. The increased susceptibility of the vessels at 3 T contributes to a more heterogeneous-appearing lesion that obscures the paramagnetic rim. SWAN = susceptibility-weighted angiography

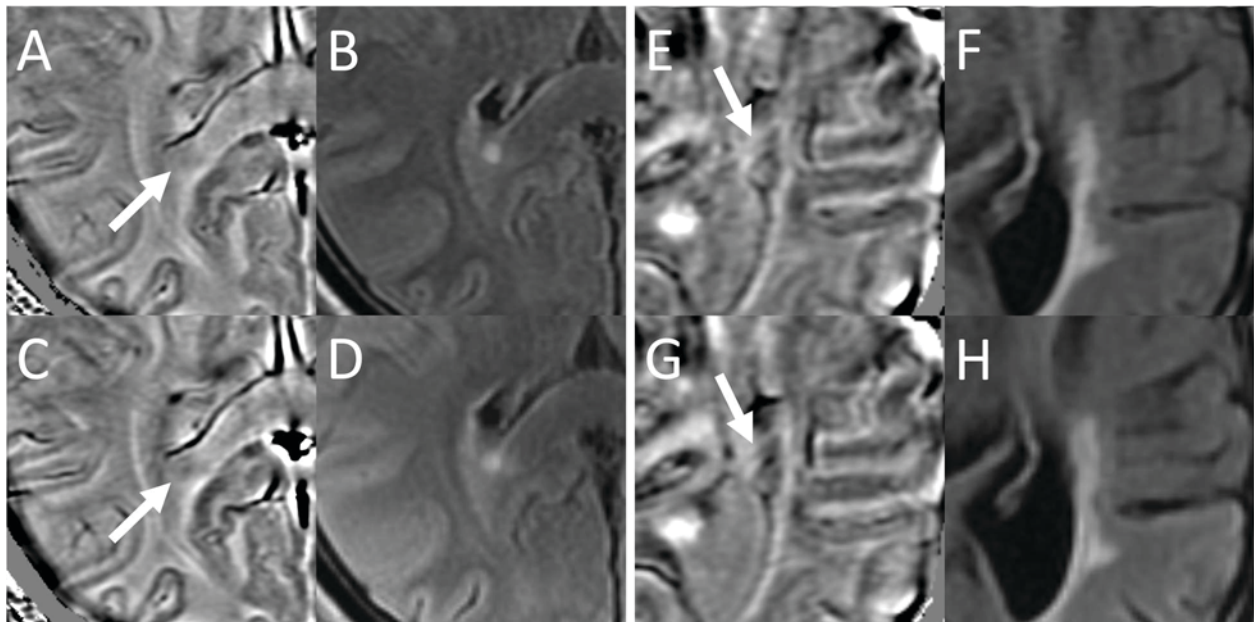

Supplement: NIHMS1831551-supplement-1.pdf [file NIHMS1831551-supplement-1.pdf]
